# Supplementary material for: Landscape Architecture Professional Knowledge Abstraction: Accessing, Applying and Disseminating
Source: MDPI journal article supplement (doi:10.3390/land12112061), 2023-11-13
Supplement: s1 [file s1]

# Supplementary Material

**Table S1. Questionnaires**

| How often do you use each of the following types of thinking or sources of knowledge in making decisions in your practice? |        |              |       |            |          |
|----------------------------------------------------------------------------------------------------------------------------|--------|--------------|-------|------------|----------|
|                                                                                                                            | Rarely | Occasionally | Often | Very Often | Not Sure |
| Intuition                                                                                                                  |        |              |       |            |          |
| Common sense                                                                                                               |        |              |       |            |          |
| Logic and reasoning                                                                                                        |        |              |       |            |          |
| Research findings                                                                                                          |        |              |       |            |          |
| Your professional experience                                                                                               |        |              |       |            |          |
| Your professional education                                                                                                |        |              |       |            |          |
| The work of other landscape architects                                                                                     |        |              |       |            |          |
| Technical standards                                                                                                        |        |              |       |            |          |
| Historical information                                                                                                     |        |              |       |            |          |
| Client expressed desires                                                                                                   |        |              |       |            |          |
| Other specialists                                                                                                          |        |              |       |            |          |
| How often do you use the following for keeping up with new knowledge in the profession?                                    |        |              |       |            |          |
|                                                                                                                            | Rarely | Occasionally | Often | Very Often | Not Sure |
| Professional documents and reports                                                                                         |        |              |       |            |          |
| Design competitions                                                                                                        |        |              |       |            |          |
| Refereed journals                                                                                                          |        |              |       |            |          |
| Professional magazines                                                                                                     |        |              |       |            |          |
| Books                                                                                                                      |        |              |       |            |          |
| Internet                                                                                                                   |        |              |       |            |          |
| Design- historic precedents                                                                                                |        |              |       |            |          |
| Short courses and workshops                                                                                                |        |              |       |            |          |
| Professional conferences                                                                                                   |        |              |       |            |          |
| Professional newsletters                                                                                                   |        |              |       |            |          |
| Professional databases                                                                                                     |        |              |       |            |          |
| Other landscape architects                                                                                                 |        |              |       |            |          |
| How often do you use the following media to disseminate your research findings?                                            |        |              |       |            |          |
|                                                                                                                            | Rarely | Occasionally | Often | Very Often | Not Sure |
| Related professionals                                                                                                      |        |              |       |            |          |
| Clients                                                                                                                    |        |              |       |            |          |
| Travelling                                                                                                                 |        |              |       |            |          |
| Everyday life                                                                                                              |        |              |       |            |          |
| Writing articles for professional magazines                                                                                |        |              |       |            |          |
| Presentations and lectures at professional conferences                                                                     |        |              |       |            |          |
| Presentations and lectures other than conference                                                                           |        |              |       |            |          |
| Writing books                                                                                                              |        |              |       |            |          |
| Writing articles for refereed journals                                                                                     |        |              |       |            |          |
| Publishing on web site                                                                                                     |        |              |       |            |          |
| Teaching in universities                                                                                                   |        |              |       |            |          |
| Teaching co-workers                                                                                                        |        |              |       |            |          |
| Other (please specify)                                                                                                     |        |              |       |            |          |

---

To what extent do you believe practice of landscape architecture today is based on the following knowledge?

---

|                                                                         | Not at all | Not too much | Fair degree | Great extent | Very great extent | Not sure |
|-------------------------------------------------------------------------|------------|--------------|-------------|--------------|-------------------|----------|
| Specialized knowledge and skills developed by its practitioners         |            |              |             |              |                   |          |
| Scientific knowledge from natural sciences (e.g., forestry and biology) |            |              |             |              |                   |          |
| Scientific knowledge from social sciences (e.g., psychology)            |            |              |             |              |                   |          |
| Abstract knowledge from humanistic disciplines (e.g., history and art)  |            |              |             |              |                   |          |

---

How often do you consult with the following professions?

---

|                                              | Not at all | Not too much | Fair degree | Great extent | Very great extent |
|----------------------------------------------|------------|--------------|-------------|--------------|-------------------|
| Architects and planners                      |            |              |             |              |                   |
| Engineers                                    |            |              |             |              |                   |
| Behavioral scientists                        |            |              |             |              |                   |
| Natural scientists                           |            |              |             |              |                   |
| Humanistic academicians                      |            |              |             |              |                   |
| Applied artists (e.g., industrial designers) |            |              |             |              |                   |
| Liberal artists (e.g., painters)             |            |              |             |              |                   |
| Systems analysts and computer specialists    |            |              |             |              |                   |

---
